# Supplementary material for: Continuous transcription initiation guarantees robust repair of all transcribed genes and regulatory regions
Source: PubMed Central journal article supplement (PMC7021815; doi:10.1038/s41467-020-14566-9), 2020-02-14
Supplement: 41467_2020_14566_MOESM3_ESM.pdf [file 41467_2020_14566_MOESM3_ESM.pdf]

## **Description of Additional Supplementary Files**

File Name: Supplementary Data 1

Description: Lists of peaks/genes/coordinates of genomic regions used in the study
